# Supplementary material
Source: PubMed Central journal article supplement (PMC8047802)
Supplement: jamacardiol-e210676-s002.pdf [file jamacardiol-e210676-s002.pdf]

## Supplementary Online Content

Boyle AJ, Schultz C, Selvanayagam JB, et al. Calcium/calmodulin-dependent protein kinase II delta inhibition and ventricular remodeling after myocardial infarction: a randomized clinical trial. *JAMA Cardiol*. Published online April 14, 2021. doi:10.1001/jamacardio.2021.0676

### **eAppendix.** Exclusion Criteria

**eTable 1.** Major Adverse Cardiac and Cerebrovascular Events (MACCE)

**eTable 2.** ECG Findings

**eTable 3.** Adverse Events Associated With Changes to ECG Parameters

**eTable 4.** Summary of New York Heart Association Classification

**eTable 5.** Change in Cardiac Biomarker NT-proBNP

**eTable 6.** Change in Cardiac Biomarker Troponin T

**eTable 7.** Investigators and Affiliated Institutions

This supplementary material has been provided by the authors to give readers additional information about their work.

## **eAppendix.** Exclusion Criteria

A subject who met any of the following criteria was not eligible for participation in this study:

1. Pregnant or breastfeeding females;
2. Known cardiomyopathy or heart failure prior to MI;
3. Cardiogenic shock and/or systolic blood pressure < 85 mmHg at screening;
4. Clinical history of ejection fraction  $\leq 45\%$  prior to MI, or multiple prior MIs;
5. Daily use of non-steroidal anti-inflammatory drugs (NSAIDs) and/or cyclooxygenase-2 (COX-2) inhibitors in the past month;
6. Prior coronary artery bypass graft to culprit vessel;
7. Presence of device/hardware incompatible with MRI imaging;
8. Estimated glomerular filtration rate < 30 mL/min;
9. Liver function tests 3 x ULN due to non-cardiac disease;
10. Receipt of any investigational research agent within 30 days or 5 half-lives (whichever was longer) prior to the first dose of IP;
11. History of severe or life-threatening drug allergy and/or known drug hypersensitivity;
12. Current malignancy or previous malignancy that was likely to recur during the period of the study (with the exception of a past history of basal or squamous cell carcinomas);
13. Human immunodeficiency virus, hepatitis B or hepatitis C;
14. Other than the current STEMI, history of or current clinically significant gastrointestinal, hepatic, renal, cardiovascular, respiratory, endocrine, oncological, immunodeficiency, neurological, metabolic, haematological, autoimmune or psychological disorder that, in the investigator's opinion, would compromise subject safety or protocol compliance;
15. Clinical signs of active infection and/or a temperature of  $>38.0^{\circ}\text{C}$  at the time of screening.

**eTable 1.** Major Adverse Cardiac and Cerebrovascular Events (MACCE)

|                                                | NP202 (N=66) |             | Placebo (N=71) |             | P value |
|------------------------------------------------|--------------|-------------|----------------|-------------|---------|
|                                                | n (%)        | [95% CI]    | n (%)          | [95% CI]    |         |
| Any MACCE event                                | 5 (7.6%)     | [2.5, 16.8] | 7 (9.9%)       | [0.9, 11.9] | NS      |
| Type of MACCE                                  |              |             |                |             |         |
| - Non-fatal MI                                 | 0            | [0.0, 5.4]  | 0              | [0.0, 5.1]  | NS      |
| - Non-fatal Stroke                             | 0            | [0.0, 5.4]  | 0              | [0.0, 5.1]  | NS      |
| - Cardiac hospitalization due to heart failure | 3 (4.5%)     | [0.9, 12.7] | 4 (5.6%)       | [0.0, 5.1]  | NS      |
| - Cardiovascular death                         | 2 (3.0%)     | [0.4, 10.5] | 2 (2.8%)       | [0.3, 9.8]  | NS      |

**eTable 2.** ECG Findings

| <b>Visit</b>                         | <b>NP202<br/>(N=66)<br/>n (%)</b> | <b>Placebo<br/>(N=71)<br/>n (%)</b> | <b>Overall<br/>(N=137)<br/>n (%)</b> |
|--------------------------------------|-----------------------------------|-------------------------------------|--------------------------------------|
| Screening: n                         | 60                                | 67                                  | 127                                  |
| Normal                               | 1 (1.7%)                          | 2 (3.0%)                            | 3 (2.4%)                             |
| Abnormal, not-clinically significant | 45 (75.0%)                        | 45 (67.2%)                          | 90 (70.9%)                           |
| Abnormal, clinically significant     | 14 (23.3%)                        | 20 (29.9%)                          | 34 (26.8%)                           |
| Visit 1 (Day 1): n                   | 34                                | 44                                  | 78                                   |
| Normal                               | 2 (5.9%)                          | 1 (2.3%)                            | 3 (3.8%)                             |
| Abnormal, not-clinically significant | 28 (82.4%)                        | 41 (93.2%)                          | 69 (88.5%)                           |
| Abnormal, clinically significant     | 4 (11.8%)                         | 2 (4.5%)                            | 6 (7.7%)                             |
| Visit 2 (Day 14): n                  | 55                                | 62                                  | 117                                  |
| Normal                               | 5 (9.1%)                          | 4 (6.5%)                            | 9 (7.7%)                             |
| Abnormal, not-clinically significant | 47 (85.5%)                        | 57 (91.9%)                          | 104 (88.9%)                          |
| Abnormal, clinically significant     | 3 (5.5%)                          | 1 (1.6%)                            | 4 (3.4%)                             |
| Visit 3 (Day 30): n                  | 52                                | 66                                  | 118                                  |
| Normal                               | 6 (11.5%)                         | 4 (6.1%)                            | 10 (8.5%)                            |
| Abnormal, not-clinically significant | 44 (84.6%)                        | 62 (93.9%)                          | 106 (89.8%)                          |
| Abnormal, clinically significant     | 2 (3.8%)                          | 0                                   | 2 (1.7%)                             |
| Visit 4 (Day 60): n                  | 51                                | 63                                  | 114                                  |
| Normal                               | 8 (15.7%)                         | 7 (11.1%)                           | 15 (13.2%)                           |
| Abnormal, not-clinically significant | 41 (80.4%)                        | 56 (88.9%)                          | 97 (85.1%)                           |
| Abnormal, clinically significant     | 2 (3.9%)                          | 0                                   | 2 (1.8%)                             |
| Visit 5 (Day 90): n                  | 50                                | 62                                  | 112                                  |
| Normal                               | 11 (22.0%)                        | 5 (8.1%)                            | 16 (14.3%)                           |
| Abnormal, not-clinically significant | 37 (74.0%)                        | 55 (88.7%)                          | 92 (82.1%)                           |
| Abnormal, clinically significant     | 2 (4.0%)                          | 2 (3.2%)                            | 4 (3.6%)                             |
| Early Withdrawal: n                  | 2                                 | 3                                   | 5                                    |
| Normal                               | 0                                 | 1 (33.3%)                           | 1 (20.0%)                            |
| Abnormal, not-clinically significant | 2 (100%)                          | 2 (66.7%)                           | 4 (80.0%)                            |
| Abnormal, clinically significant     | 0                                 | 0                                   | 0                                    |
| End of Study (Day 120): n            | 50                                | 61                                  | 111                                  |
| Normal                               | 14 (28.0%)                        | 7 (11.5%)                           | 21 (18.9%)                           |
| Abnormal, not-clinically significant | 35 (70.0%)                        | 53 (86.9%)                          | 88 (79.3%)                           |
| Abnormal, clinically significant     | 1 (2.0%)                          | 1 (1.6%)                            | 2 (1.8%)                             |

Data is presented as n (%) where n is the number of subjects, % is the percentage of subjects within a treatment group.

**eTable 3.** Adverse Events Associated With Changes to ECG Parameters

| <b>Preferred Term</b>             | <b>NP202<br/>(N=66)<br/>n (%)</b> | <b>Placebo<br/>(N=71)<br/>n (%)</b> | <b>Overall<br/>(N=137)<br/>n (%)</b> |
|-----------------------------------|-----------------------------------|-------------------------------------|--------------------------------------|
| Palpitations                      | 2 (3.0%)                          | 1 (1.4%)                            | 3 (2.2%)                             |
| Arrhythmia                        | 0                                 | 2 (2.8%)                            | 2 (1.5%)                             |
| Electrocardiogram abnormal        | 1 (1.5%)                          | 1 (1.4%)                            | 2 (1.5%)                             |
| Bradycardia                       | 2 (3.0%)                          | 0                                   | 2 (1.5%)                             |
| Ventricular tachycardia           | 2 (3.0%)                          | 0                                   | 2 (1.5%)                             |
| Atrial flutter                    | 0                                 | 1 (1.4%)                            | 1 (0.7%)                             |
| Pulseless electrical activity     | 1 (1.5%)                          | 0                                   | 1 (0.7%)                             |
| Sinus bradycardia                 | 1 (1.5%)                          | 0                                   | 1 (0.7%)                             |
| Supraventricular tachycardia      | 0                                 | 1 (1.4%)                            | 1 (0.7%)                             |
| Cardiac murmur                    | 1 (1.5%)                          | 0                                   | 1 (0.7%)                             |
| ECG signs of myocardial ischaemia | 0                                 | 1 (1.4%)                            | 1 (0.7%)                             |
| Electrocardiogram QT prolonged    | 1 (1.5%)                          | 0                                   | 1 (0.7%)                             |
| Radial pulse abnormal             | 0                                 | 1 (1.4%)                            | 1 (0.7%)                             |

Data is presented as n (%) where n is the number of subjects, % is the percentage of subjects within a treatment group.

**eTable 4.** Summary of New York Heart Association Classification

| <b>Visit<br/>Classification</b> | <b>NP202<br/>(N=66)<br/>n (%)</b> | <b>Placebo<br/>(N=71)<br/>n (%)</b> | <b>Overall<br/>(N=137)<br/>n (%)</b> |
|---------------------------------|-----------------------------------|-------------------------------------|--------------------------------------|
| Visit 2 (Day 14)                |                                   |                                     |                                      |
| Number assessed                 | 56                                | 66                                  | 122                                  |
| I                               | 42 (75.0%)                        | 43 (65.2%)                          | 85 (69.7%)                           |
| II                              | 12 (21.4%)                        | 22 (33.3%)                          | 34 (27.9%)                           |
| III                             | 2 (3.6%)                          | 1 (1.5%)                            | 3 (2.5%)                             |
| IV                              | 0                                 | 0                                   | 0                                    |
| Visit 5 (Day 90)                |                                   |                                     |                                      |
| Number assessed                 | 51                                | 62                                  | 113                                  |
| I                               | 40 (78.4%)                        | 56 (90.3%)                          | 96 (85.0%)                           |
| II                              | 11 (21.6%)                        | 6 (9.7%)                            | 17 (15.0%)                           |
| III                             | 0                                 | 0                                   | 0                                    |
| IV                              | 0                                 | 0                                   | 0                                    |
| Early Withdrawal                |                                   |                                     |                                      |
| Number assessed                 | 3                                 | 4                                   | 7                                    |
| I                               | 2 (66.7%)                         | 4 (100%)                            | 6 (85.7%)                            |
| II                              | 0                                 | 0                                   | 0                                    |
| III                             | 1 (33.3%)                         | 0                                   | 1 (14.3%)                            |
| IV                              | 0                                 | 0                                   | 0                                    |
| End of Study (Day 120)          |                                   |                                     |                                      |
| Number assessed                 | 51                                | 62                                  | 113                                  |
| I                               | 42 (82.4%)                        | 57 (91.9%)                          | 99 (87.6%)                           |
| II                              | 9 (17.6%)                         | 5 (8.1%)                            | 14 (12.4%)                           |
| III                             | 0                                 | 0                                   | 0                                    |
| IV                              | 0                                 | 0                                   | 0                                    |

Data is presented as n (%) where n is the number of subjects, % is the percentage of subjects within a treatment group.

**eTable 5.** Change in Cardiac Biomarker NT-proBNP

|          | NT-proBNP (ng/L)          | NP202              | Placebo             | Treatment difference p-value |
|----------|---------------------------|--------------------|---------------------|------------------------------|
| Baseline | Mean (SD)                 | 1933.92 (1891.853) | 2470.65 (2398.146)  | 0.1629                       |
| Day 14   | Mean (SD)                 | 1727.39 (1282.019) | 1848.50 (1378.635)  | 0.6293                       |
|          | Change from Baseline (SD) | -193.48 (1484.119) | -344.51 (1164.685)  | 0.5599                       |
| Day 30   | Mean (SD)                 | 1314.91 (1084.954) | 1265.46 (924.478)   | 0.7915                       |
|          | Change from Baseline (SD) | -579.06 (1348.244) | -904.86 (1437.477)  | 0.2256                       |
| Day 60   | Mean (SD)                 | 799.85 (854.790)   | 683.80 (477.762)    | 0.3728                       |
|          | Change from Baseline (SD) | -873.77 (1122.854) | -1534.07 (1764.695) | 0.0298                       |
| Day 90   | Mean (SD)                 | 633.80 (914.544)   | 570.18 (487.813)    | 0.6434                       |
|          | Change from Baseline (SD) | -1037.63 (898.240) | -1721.75 (1770.300) | 0.0169                       |
| Day 120  | Mean (SD)                 | 581.98 (922.018)   | 468.16 (348.217)    | 0.3862                       |
|          | Change from Baseline (SD) | -1047.61 (935.348) | -1855.59 (1848.304) | 0.0073                       |

Abbreviations: NT-proBNP=brain natriuretic peptide type B; SD=standard

**eTable 6.** Change in Cardiac Biomarker Troponin T

|          | <b>Troponin T (ng/L)</b>  | <b>NP202</b>           | <b>Placebo</b>      | <b>Treatment difference p-value</b> |
|----------|---------------------------|------------------------|---------------------|-------------------------------------|
| Baseline | Mean (SD)                 | 3000.20<br>(1819.500)  | 3458.59 (2108.394)  | 0.1949                              |
|          | Mean (SD)                 | 93.24 (132.508)        | 92.52 (121.521)     | 0.9758                              |
| Day 14   | Change from Baseline (SD) | -2729.41<br>(1797.626) | -3320.06 (1814.337) | 0.0953                              |
| Day 30   | Mean (SD)                 | 31.04 (53.012)         | 35.92 (45.920)      | 0.5960                              |
|          | Change from Baseline (SD) | -2719.21<br>(1784.823) | -3280.55 (1876.283) | 0.1144                              |
| Day 60   | Mean (SD)                 | 19.57 (12.119)         | 22.61 (15.767)      | 0.2771                              |
|          | Change from Baseline (SD) | -2669.64<br>(1845.985) | -3319.06 (1904.530) | 0.0874                              |
| Day 90   | Mean (SD)                 | 15.37 (8.962)          | 18.90 (12.936)      | 0.1082                              |
|          | Change from Baseline (SD) | -2607.76<br>(1531.102) | -3395.65 (1891.258) | 0.0240                              |
| Day 120  | Mean (SD)                 | 15.69 (12.178)         | 18.42 (14.080)      | 0.2927                              |
|          | Change from Baseline (SD) | -2531.51<br>(1386.457) | -3501.66 (1848.879) | 0.0040                              |

**eTable 7.** Investigators and Affiliated Institutions

| <b>Name of Site and Investigator</b>                                                | <b>Address of Site</b>                                                     |
|-------------------------------------------------------------------------------------|----------------------------------------------------------------------------|
| Royal Perth Hospital<br>Prof Carl Schultz                                           | Wellington Street<br>Perth WA 6000<br>Australia                            |
| Fiona Stanley Hospital<br>Michael Nguyen                                            | 100-118 Murdoch Drive<br>Murdoch WA 6150<br>Australia                      |
| Flinders Medical Centre<br>Prof Joseph Selvanayagam                                 | 1 Flinders Drive<br>Bedford Park SA 5042<br>Australia                      |
| Northern Hospital<br>Prof William van Gaal                                          | 185 Cooper St<br>Epping Vic 3076<br>Australia                              |
| John Hunter Hospital<br>Prof Andrew Boyle                                           | Locked Bag 1<br>Hunter Region Mail Centre NSW 2310<br>Australia            |
| Cairns Hospital Greg<br>Starmer                                                     | The Esplanade<br>Cairns QLD 4870 Australia                                 |
| The Prince Charles Hospital<br>Prof Darren Walters                                  | Rode Road<br>Chermside QLD 4032 Australia                                  |
| Liverpool Hospital<br>Prof John French                                              | Elizabeth St Liverpool NSW 2170<br>Australia                               |
| Waikato Hospital Dr<br>Gerard Devlin                                                | Pembroke Street Hamilton<br>New Zealand                                    |
| Department of Medicine<br>University of Otago,<br>Christchurch<br>Richard Troughton | 2 Riccarton Avenue<br>Christchurch 8011 New Zealand                        |
| Nelson Hospital<br>Tammy Pegg                                                       | Tipahi Street, Nelson 7010<br>New Zealand                                  |
| The Christ Hospital<br>Dean Kereiakes                                               | 2123 Auburn Ave<br>Suite 424<br>Cincinnati OH 45219 United States          |
| United Heart &<br>Vascular Clinic<br>Allina Health<br>Kenneth Baran                 | 225 Smith Ave N, Suite 400 St. Paul<br>MN 55102<br>United States           |
| Michigan Heart<br>St Joseph Mercy Health System<br>Zakir Sahul                      | 5325 Elliott Drive<br>Ypsilanti MI 48197 United States                     |
| Metropolitan Heart and Vascular Institute<br>Allina Health<br>Jeffrey Chambers      | Suite 120, 4040 Coon Rapids Blvd<br>Coon Rapids, MN 55433<br>United States |
| Krannert Institute of Cardiology<br>Richard Kovacs                                  | 1800 N. Capitol Ave E300A<br>Indianapolis, IN 46202 United States          |
| University of Arizona<br>Sarver Heart Center<br>Ranjith Shetty                      | 1501 N. Campbell Ave PO Box 245046<br>Tucson, AZ 85724 United States       |
| MCVI Research at Covenant Medical Center<br>Safwan Kassas                           | 700 Cooper Ave<br>Saginaw, MI 48602 United States                          |

|                                                                                                                        |                                                                                      |
|------------------------------------------------------------------------------------------------------------------------|--------------------------------------------------------------------------------------|
| MidMichigan Medical Center -<br>Midland Maged Rizk                                                                     | 4005 Orchard Drive Room O2261<br>Midland, MI 48670<br>United States                  |
| Dignity Health<br>Mercy Gilbert Medical Center<br>Nabil Dib                                                            | 3555 S. Val Vista Dr. Gilbert, AZ<br>85297<br>United States                          |
| CAVHS Cardiology Research<br>Barry Uretsky                                                                             | 4300 West 7th 5CSlot 111B<br>Little Rock, AR 72205 United States                     |
| Dignity Health<br>St. John' s Regional Medical Center<br>Alejandro Garcia                                              | 1600 N. Rose Ave. Oxnard, CA 93030<br>United States                                  |
| University of Oklahoma Health Sciences Center<br>Department of Medicine, Cardiovascular<br>Research<br>Mazen Abu-Fadel | 920 Stanton L. Young Blvd. WP 3010<br>Oklahoma City, OK 73104 United<br>States       |
| Rochester General Hospital<br>Jeremiah Depta                                                                           | 1425 Portland Ave<br>Rochester, NY 14621 United States                               |
| Holy Name Medical Center<br>Angel Mulkay                                                                               | 718 Teaneck Road<br>Teaneck, NJ 07666 United States                                  |
| University at Buffalo<br>Clinical and Translational Research Center<br>David Zlotnick                                  | 875 Ellicott Street Suite 6040P<br>Buffalo, NY 14203 United States                   |
| Austin Heart Research - Austin<br>Roger Gammon                                                                         | 3801 North Lamar<br>Suite 300<br>Austin, TX 78756 United States                      |
| Austin Heart Research - Round Rock<br>Craig Siegel                                                                     | 2410 Round Rock Ave Suite 110<br>Round Rock, TX 78681 United States                  |
| University of California, Irvine<br>Dawn Lombardo                                                                      | 101 City Dr. South<br>The City Tower, Suite 400 Orange, CA<br>92868<br>United States |
| Dignity Health Sequoia Hospital<br>Donald St. Claire                                                                   | 170 Alameda de Las Pulgas<br>Redwood City, CA 94062 United States                    |
| VA San Diego Health Care System<br>Cardiology Research<br>William Penny                                                | 3350 La Jolla Village Drive 111A-1<br>San Diego, CA 92161<br>United States           |
