# Supplementary material
Source: PubMed Central journal article supplement (PMC8047802)
Supplement: jamacardiol-e210676-s003.pdf [file jamacardiol-e210676-s003.pdf]

## **Data Sharing Statement**

**Data**

**Data available:** No
